# Supplementary material for: Nanostructured ZnO-Based Electrochemical Sensor with Anionic Surfactant for the Electroanalysis of Trimethoprim
Source: MDPI journal article supplement (doi:10.3390/bioengineering9100521), 2022-10-02
Supplement: s1 [file s1]

## SUPPORTING INFORMATION

### Nanostructured ZnO based electrochemical sensor with anionic surfactant for the electroanalysis of trimethoprim

Vinoda B. Patil<sup>1</sup>, Davalasab Ilager<sup>2</sup>, Suresh M. Tuwar<sup>1</sup>, Nagaraj P. Shetti<sup>3\*</sup>

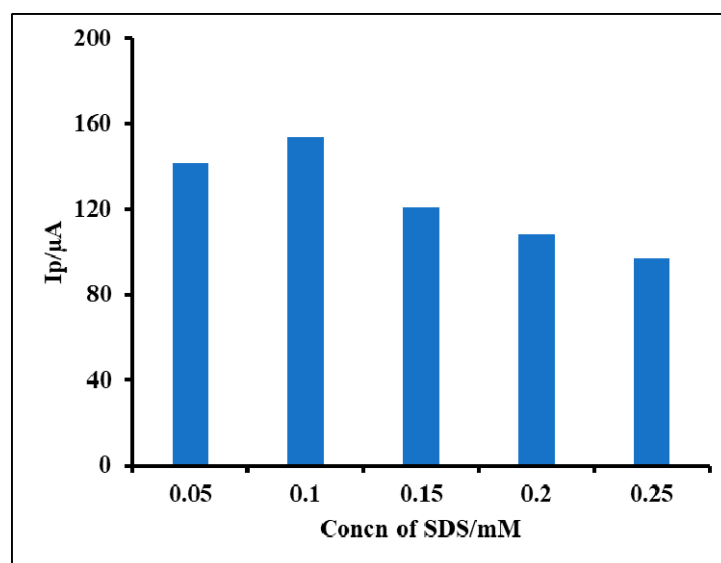

Figure S1. Different concentration of SDS ( 0.05mM,0.1mM, 0.15mM, 0.2mM, 0.25Mm) at 0.05 mM TMP with scan rate 0.05V/s.

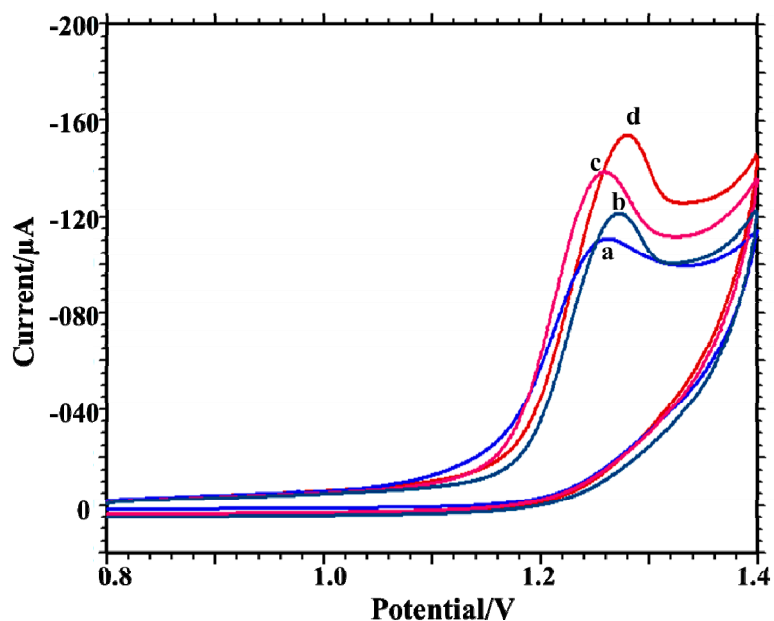

Figure S2. CV Voltammogram of different buffers (a; citrate buffer, b; sulphuric acid, c; Britton-Robinson buffer, d; phosphate buffer solutions) at 0.05 mM TMP with scan rate 0.05V/s.

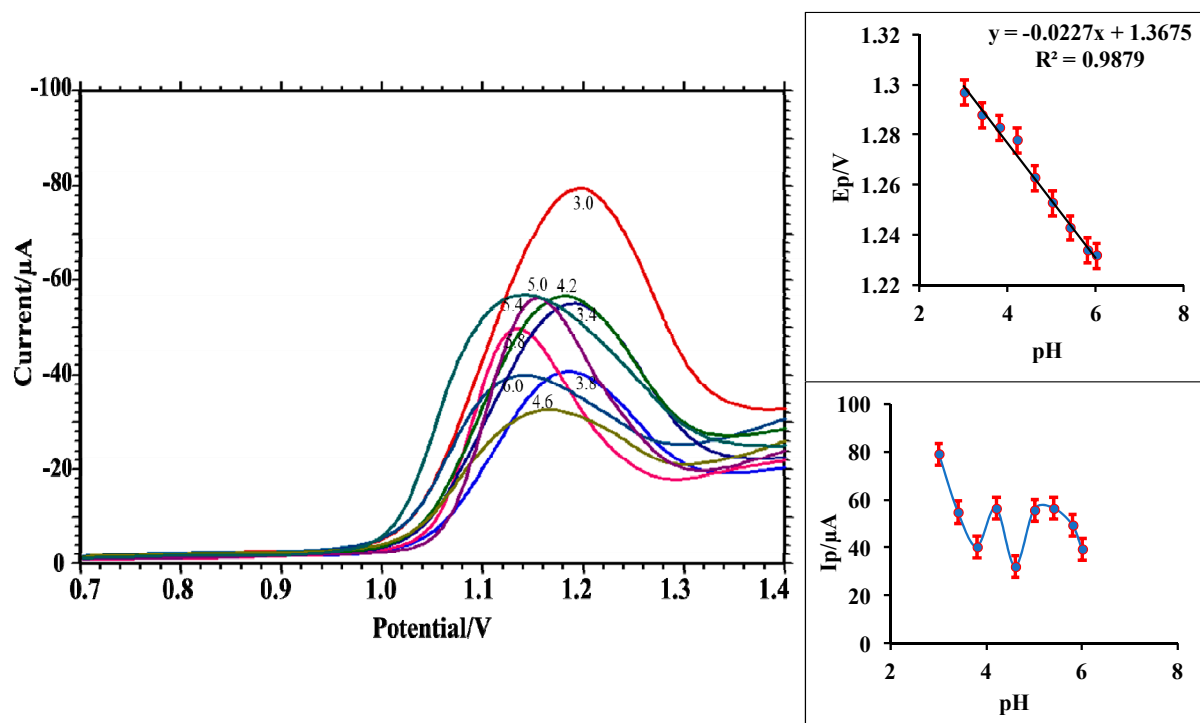

Figure S3. Effect of pH on electrochemical behavior of TMP by DPV method.

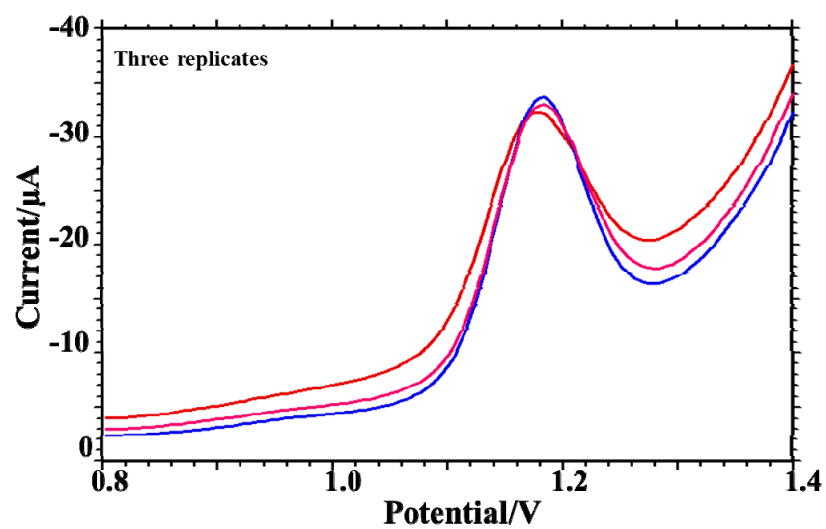

Figure S4. DPV for tablet analysis.

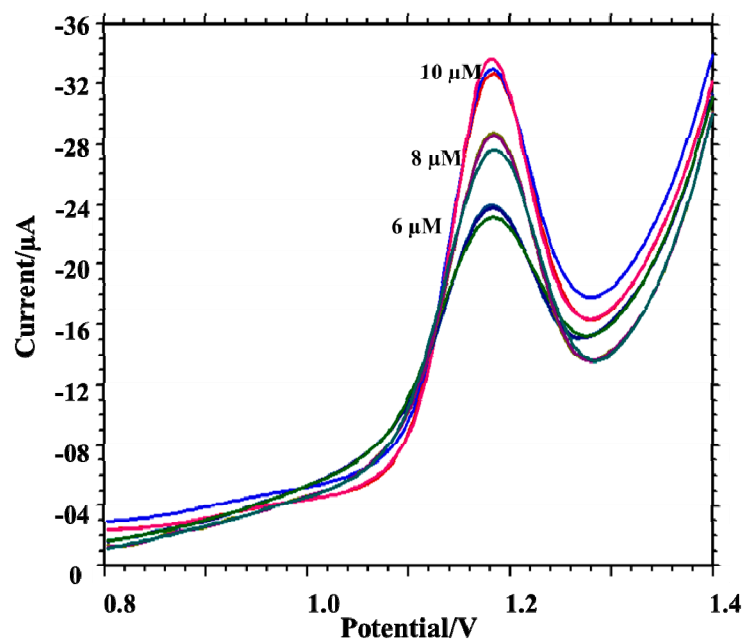

Figure S5. DPV for urine samples

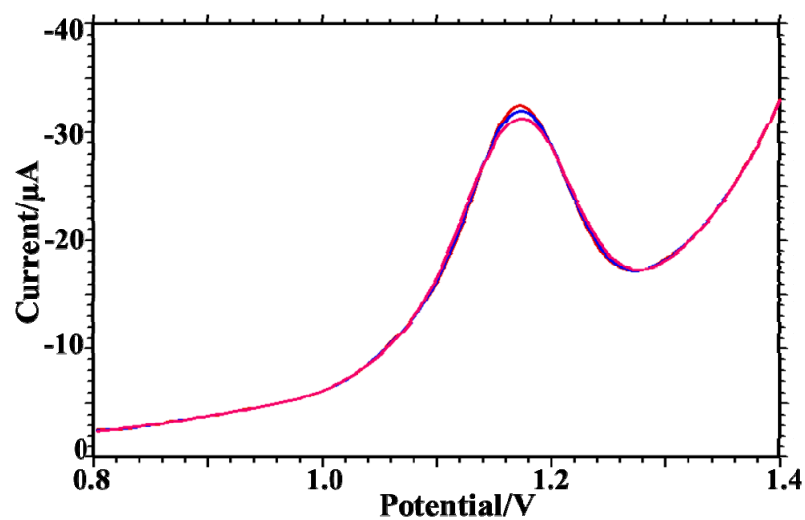

Figure S6. Reusability of SDS/ZnO/CPE sensor at 0.01mM TMP.

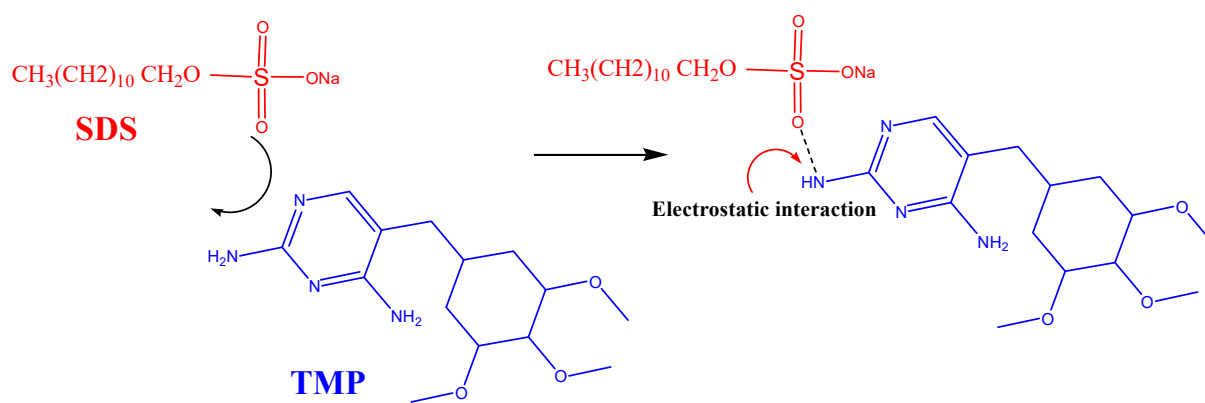

Scheme S1. Probable interaction of SDS and TMP.
